# Supplementary material for: Prevalence of Ten Gene Variants Involved in Muscular Phenotypes in a Mexican Mestizo Population
Source: MDPI journal article supplement (doi:10.3390/muscles2040030), 2023-12-08
Supplement: s1 [file s1]

## SUPPLEMENTARY MATERIAL. FIGURE S1 SIMULATION OF CASE-CONTROL STUDY PARAMETERS

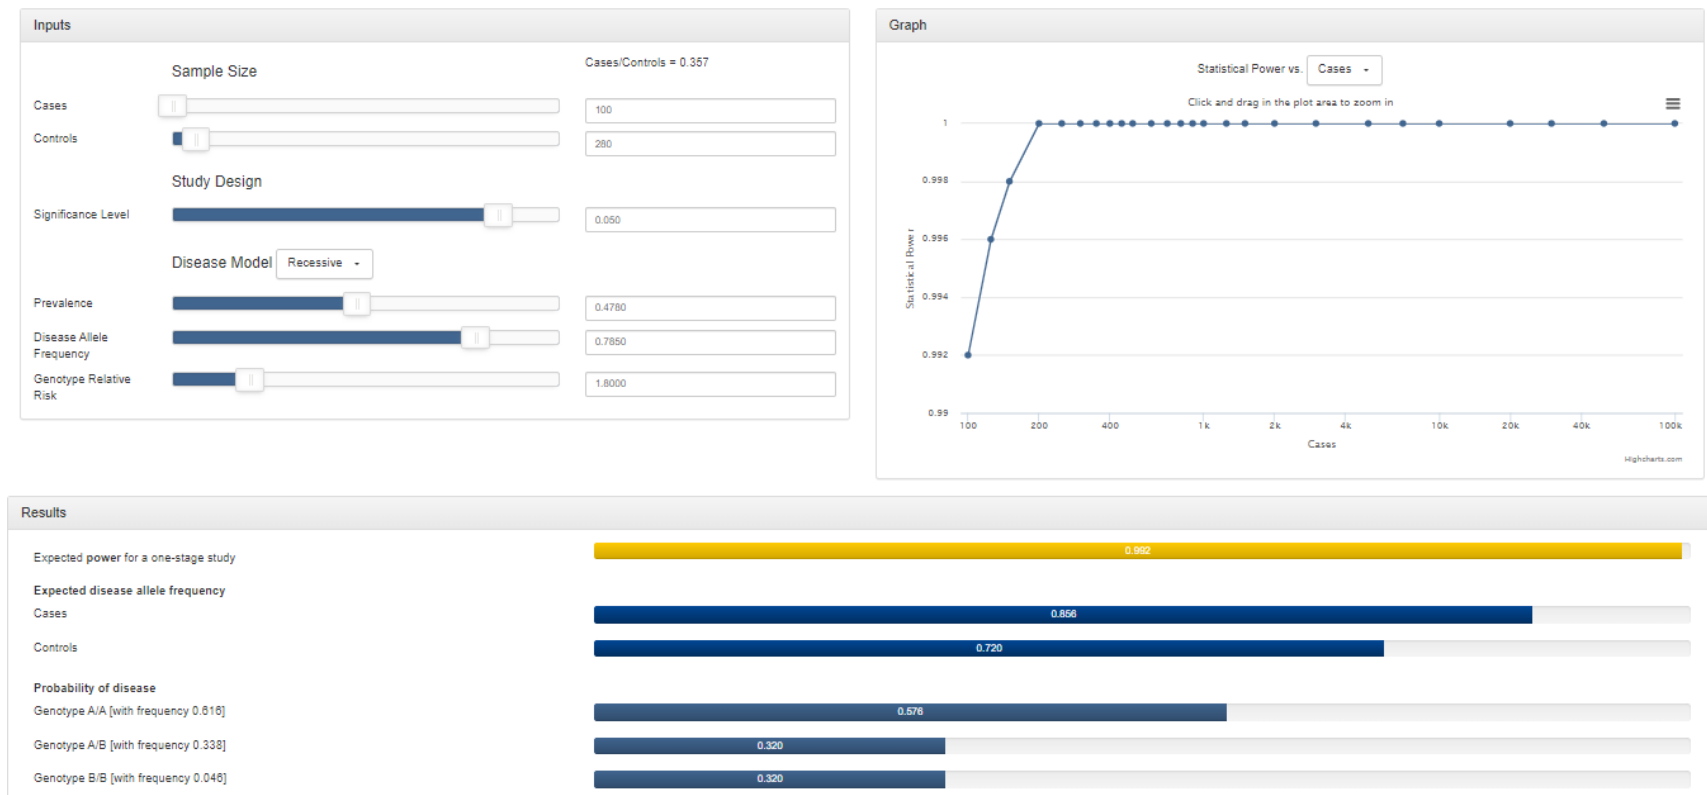

A simulation was performed with the prevalence of hypertension in Mexicans of 47.8%, according to what was published by Campos-Nonato et al. Taking the odds ratio published by Bonfim-Silva (OR=1.8), we subsequently introduced data from the present article, such as the frequency of the risk allele.

1. Bonfim-Silva, R.; Guimaraes, L.O.; Souza Santos, J.; Pereira, J.F.; Leal Barbosa, A.A.; Souza Rios, D.L. Case-control association study of polymorphisms in the angiotensinogen and angiotensin-converting enzyme genes and coronary artery disease and systemic artery hypertension in African-Brazilians and Caucasian-Brazilians. *Journal of genetics* 2016, 95, 63-69.
2. Campos-Nonato I, Oviedo-Solis C, Vargas-Meza J, Ramirez-Villalobos D, Medina-Garcia C, Gomez-Alvarez E, Hernandez-Barrera L, Barquera S. Prevalencia, tratamiento y control de la hipertension arterial en adultos mexicanos: resultados de la Ensanut 2022. *Salud Publica Mex [Internet]*. 14 de junio de 2023 [citado 7 de noviembre de 2023];65:s169-s180. Disponible en: <https://saludpublica.mx/index.php/spm/article/view/147>
